# Supplementary material for: DNS (v1.0): An open source ray-tracing tool for space geodetic techniques
Source: Copernicus journal article supplement (doi:10.5194/gmd-2024-237), 2025-03-27
Supplement: Supplementary file [file gmd-2024-237-AC4-supplement.pdf]

*Point2point response:*

*We thank the reviewer for the positive feedback. Please, find the point2point response below (red and italic).*

The authors Florian Zus et al. introduce an open source ray-tracing tool for space geodetic techniques, named DNS (v1.0). This tool is very efficient in calculating ray-traced delays at optical and microwave frequencies in the neutral atmosphere and ionosphere, applying various numerical data sets such as operational or re-analysis datasets of the ECMWF and Nequick2.

With its speed (at least an order of magnitude faster than existing packages), it provides users with the possibility to improve parameterized models, such as mapping functions. Congratulations and thanks for providing this tool to the community.

Minor comments:

1122: Dealy -> Delay

*Will be corrected.*

1144: \theta is not used in equation (\varphi)

*Will be corrected.*

1179: angel -> angle

*Will be corrected.*

1319: hypothesis

*Will be corrected.*

1336: utilized

*Will be corrected.*

Figures 4 and 5: Should it read  $d_h^z$  instead of  $d_n^z$  ?

*You are right, it should be  $d_h^z$ . Will be corrected.*

Figure 6 is hardly readable

*The quality of figure 6 (4 and 5) will be improved in the revised version of the manuscript.*
